# Supplementary material
Source: PubMed Central journal article supplement (PMC2921927)
Supplement: NIHMS223306-supplement-Supp1.pdf [file NIHMS223306-supplement-Supp1.pdf]

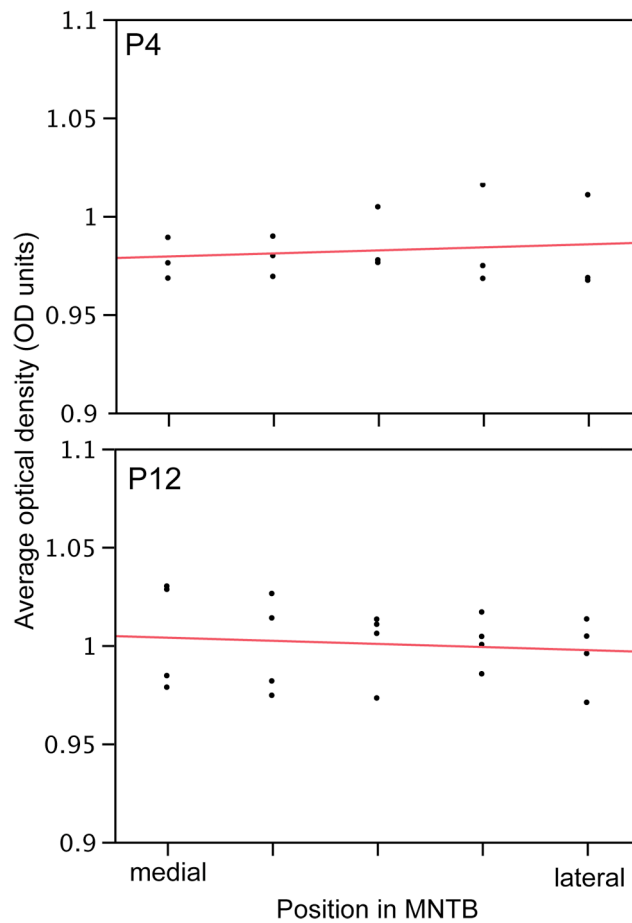

**Supplemental Figure 1. Ephrin-B2 is not expressed in a mediolateral gradient in postnatal MNTB.** At P4 (top panel) and P12 (bottom panel), optical density measurements of ephrin-B2 expression were compared along the mediolateral axis of MNTB. A linear regression revealed no gradient of expression across this axis of MNTB, at these two early developmental timepoints.

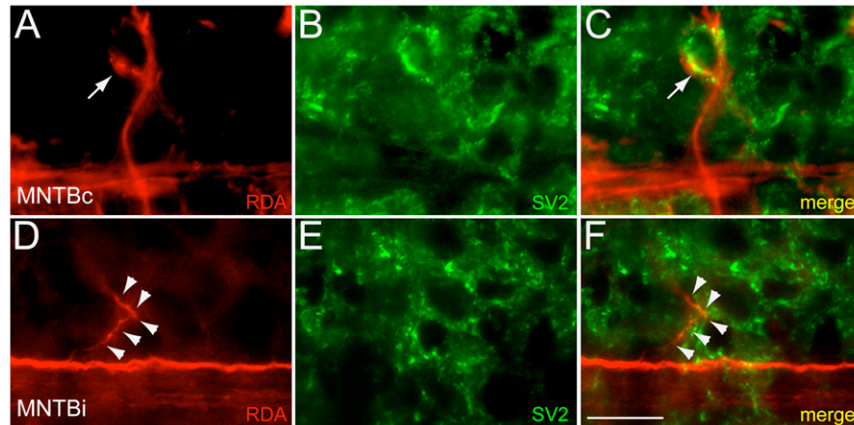

**Supplemental Figure 2. Terminations in MNTBc but not MNTBi are**

**immunopositive for SV2.** *A.* RDA labeling in MNTBc of a P3 wild type reveals an immature calyceal termination (arrow). *B.* Expression of SV2 in the same section of MNTBc as *A.* *C.* Merge of panels *A* and *B* reveals that the immature calyceal termination in MNTBc is immunopositive for SV2 (arrow). *D.* RDA labeling in MNTBi of a P3 wild type mouse reveals an ipsilateral branch (arrowheads). *E.* Expression of SV2 in the same section of MNTBi as in *D.* *F.* Merge of panels *D* and *E* shows that the RDA-labeled branch is not immunopositive for SV2 (arrowheads). Scale bar in *F* also applies to *A-E*, and indicates 20  $\mu\text{m}$ .

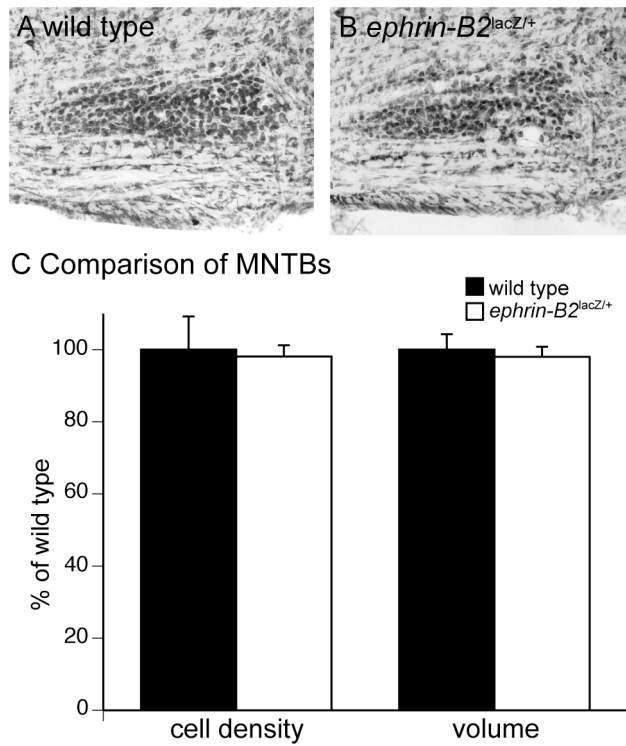

**Supplemental Figure 3. Wild type and *ephrin-B2*<sup>lacZ/+</sup> brainstem morphology are similar.** **A.** Thionin-stained tissue showing MNTB morphology in a P12 wild type mouse. **B.** Thionin-stained tissue showing MNTB morphology in a P12 *ephrin-B2*<sup>lacZ/+</sup> mouse. **C.** MNTB cell density and volume in *ephrin-B2*<sup>lacZ/+</sup> mice (white) as a proportion of wild type (black) mean values reveals no significant difference in these mutants.

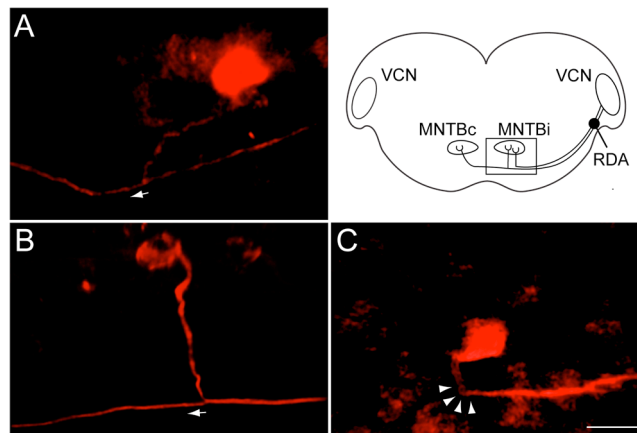

**Supplemental Figure 4. Individual axon labeling in mutant mice indicates origins of ipsilateral calyces.** Focal labeling of individually resolved axons was performed at P6-28 in *ephrin-B2*<sup>lacZ/+</sup> mice. Schematic diagram indicates dye placement and orientation of images. **A.** Calyx in MNTBi arises from an axon traveling horizontally towards the midline (arrow). **B.** Another example of a calyx in MNTBi arising from an axon projecting towards the midline (arrow). **C.** Calyx in MNTBi arises from an axon projection from the ipsilateral VCN. Arrowheads indicate the lack of axon projection toward the midline. Scale bar in C also applies to A-B and indicates 10  $\mu\text{m}$ .
